# Supplementary material
Source: publisher site journal article supplement (https://en-cdn.bio-protocol.org/attached/file/20180806/2978%20Supplemental%20file%20insertion%20cassette.docx)
Supplement: Supplementary file 1 [file 2978%20Supplemental%20file%20insertion%20cassette.docx]

| **Cassette** | **description** | **Derived from vector** | **size** |
| --- | --- | --- | --- |
| B | pRFPBSD | 30549 | 2.3 kb |

actagcatgagcgagctgatcaaggagaacatgcacatgaagctgtacatggagggcaccgtgaacaaccaccacttcaagtgcacatccgagggcgaaggcaagccctacgagggcacccagaccatgaagatcaaggtggtcgagggcggccctctccccttcgccttcgacatcctggctaccagcttcatgtacggcagcaaagccttcatcaaccacacccagggcatccccgacttctttaagcagtccttccctgagggcttcacatgggagagaatcaccacatacgaagacgggggcgtgctgaccgctacccaggacaccagcttccagaacggctgcatcatctacaacgtcaagatcaacggggtgaacttcccatccaacggccctgtgatgcagaagaaaacacgcggctgggaggccaacaccgagatgctgtaccccgctgacggcggcctgagaggccacagccagatggccctgaagctcgtgggcgggggctacctgcactgctccttcaagaccacatacagatccaagaaacccgctaagaacctcaagatgcccggcttccacttcgtggaccacagactggaaagaatcaaggaggccgacaaagagacctacgtcgagcagcacgagatggctgtggccaagtactgcgacctccctagcaaactggggcacagatgacgatcatattcaataacccttaatataacttcgtataatgtatgctatacgaagttattaggtctgaagaggagtttacgtccagccaagcttaggatctcgacctcgaaattctaccgggtaggggaggcgcttttcccaaggcagtctggagcatgcgctttagcagccccgctgggcacttggcgctacacaagtggcctctggcctcgcacacattccacatccaccggtaggcgccaaccgactccgttctttggtggccccttcgcgccaccttctactcctcccctagtcaggaagttcccccccgccccgcagctcgcgtcgtgcaggacgtgacaaatggaagtagcacgtctcactagtctcgtgcagatggacagcaccgctgagcaatggaagcgggtaggcctttggggcagcggccaatagcagctttgctccttcgctttctgggctcagaggctgggaaggggtgggtccgggggcgggctcaggggcgggctcaggggcggggcgggcgcccgaaggtcctccggaggcccggcattctgcacgcttcaaaagcgcacgtctgccgcgctgttctcctcttcctcatctccgggcctttcgacctgcatccatctagatctcgagcagctgaagcttaccatggccaagcctttgtctcaagaagaatccaccctcattgaaagagcaacggctacaatcaacagcatccccatctctgaagactacagcgtcgccagcgcagctctctctagcgacggccgcatcttcactggtgtcaatgtatatcattttactgggggaccttgtgcagaactcgtggtgctgggcactgctgctgctgcggcagctggcaacctgacttgtatcgtcgcgatcggaaatgagaacaggggcatcttgagcccctgcggacggtgccgacaggtgcttctcgatctgcatcctgggatcaaagccatagtgaaggacagtgatggacagccgacggcagttgggattcgtgaattgctgccctctggttatgtgtgggagggctaacgcccgccccacgacccgcagcgcccgaccgaaaggagcgcacgaccccatgcatcgatgatatcagatccccgggatgcagaaattgatgatctattaaacaataaagatgtccactaaaatggaagtttttcctgtcatactttgttaagaagggtgagaacagagtacctacattttgaatggaaggattggagctacgggggtgggggtggggtgggattagataaatgcctgctctttactgaaggctctttactattgctttatgataatgtttcatagttggatatcataatttaaacaagcaaaaccaaattaagggccagctcattcctcccactcatgatctatagatctatagatctctcgtgggatcattgtttttctcttgattcccactttgtggttctaagtactgtggtttccaaatgtgtcagtttcatagcctgaagaacgagatcagcagcctctgttccacatacacttcattctcagtattgttttgccaagttctaattccatcagaagctggtcgagatccggaacccttaatataacttcgtataatgtatgctatacgaagttattaggtccctcgaagaggttcactaggcgcgcc

Red = RFP; underlined = PGK promoter; Gray = Blasticidin resistance; teal = lox sites.
